# Supplementary material
Source: publisher figshare collection journal article supplement (https://future-science-group.figshare.com/ndownloader/files/28250223)
Supplement: Supplementary file 1 [file 28250223]

Table 1: The main patent assignees in Europe – On the right-side not European main co-assignees (co-assigned patents) (online only)

| **#** | **Assignee** | **# of Families** | **# of  Patents** | **I.I.** | **Headquarters (Country)** |
| --- | --- | --- | --- | --- | --- |
| 1 | **Roche** | **357** | **1343** | 3,8 | Basilea (Swisse) |
| 2 | **Inserm** | **247** | **691** | 2,8 | Paris (France) |
| 3 | **Novartis** | **182** | **858** | 4,7 | Basilea (Swisse) |
| 4 | **Philips** | **204** | **499** | 2,4 | Amsterdam (Netherland) |
| 5 | **CNRS** | **136** | **394** | 2,9 | Paris (France) |
| 6 | **Immatics Biotech..** | **114** | **447** | 3,9 | Tuebingen (Germany) |
| 7 | **Siemens** | **98** | **184** | 1,9 | Munchen (Germany) |
| 8 | **Nestec** | **91** | **400** | 4,4 | Vevey (Swisse) |
| 9 | **Varian Medical Systems** | **62** | **109** | 1,8 | Zug (Swisse) |
| 10 | **Université Rene Descartes** | **55** | **119** | 2,2 | Paris (France) |
| 11 | **University Of London** | **52** | **147** | 2,8 | London (UK) |
| 12 | **University Of Cambridge** | **46** | **198** | 4,3 | Cambridge (UK) |
| 13 | **Ass. Publique Hopitaux De Paris** | **44** | **115** | 2,6 | Paris (France) |
| 14 | **University Health Network** | **37** | **89** | 2,4 | Totonto (Canada) |
| 15 | **B.R.A.H.M.S.** | **33** | **121** | 3,7 | Berlin (Germany) |

| **#** | **Co-Assignees** | **# of Families** | **# of  Patents** | **I.I.** | **Country** |
| --- | --- | --- | --- | --- | --- |
| 1 | **Genentech** | **83** | **190** | 2,2 | USA |
| 2 | **Harvard University** | **43** | **127** | 2,9 | USA |
| 3 | **Univ. Of California** | **16** | **33** | 2.1 | USA |
